# Supplementary material for: Histone deacetylase 6 inhibition enhances oncolytic viral replication in glioma
Source: JCI journal article supplement (doi:10.1172/jci80713), 2015-10-20
Supplement: sd1 [file 1]

## **Histone Deacetylase 6 can impede oncolytic viral replication in glioma.**

### **Supplemental Figures**

Hiroshi Nakashima<sup>1,8</sup>, Johanna K. Kaufmann<sup>1,8,9</sup>, Pin-Yi Wang<sup>2</sup>, Tran Nguyen<sup>1</sup>, Maria-Carmela Speranza, Kazue Kasai<sup>1</sup>, Kazuo Okemoto<sup>3</sup>, Akihiro Otsuki<sup>4</sup>, Ichiro Nakano<sup>3</sup>, Soledad Fernandez<sup>5</sup>, William F. Goins<sup>6</sup>, Paola Grandi<sup>6</sup>, Joseph C. Glorioso<sup>6</sup>, Sean Lawler<sup>1</sup>, Timothy P. Cripe<sup>2</sup>, and E. Antonio Chiocca<sup>1,7</sup>

<sup>1</sup> Department of Neurosurgery; Brigham and Women's Hospital; Boston, MA, 02115, USA

<sup>2</sup> Division of Hematology/Oncology/BMT; Nationwide Children's Hospital; Columbus, OH, 43205, USA

<sup>3</sup> Department of Neurosurgery; The Ohio State University Medical Center; Columbus, OH, 43210, USA

<sup>4</sup> Division of Anesthesiology and Critical Care Medicine; Tottori University

Faculty of Medicine; Yonago, Tottori, 683-8504, Japan

<sup>5</sup> Department of Biomedical Informatics; The Ohio State University; Columbus, OH, 43210, USA

<sup>6</sup> Department of Neurosurgery; University of Pittsburgh Cancer Institute/UPCI; Pittsburgh, PA, 15232, USA

<sup>7</sup> Corresponding author: [eachiocca@partners.org](mailto:eachiocca@partners.org)

<sup>8</sup> Co-first author

<sup>9</sup> current address: Genocea Biosciences, Inc.; Cambridge, MA, 02140, USA

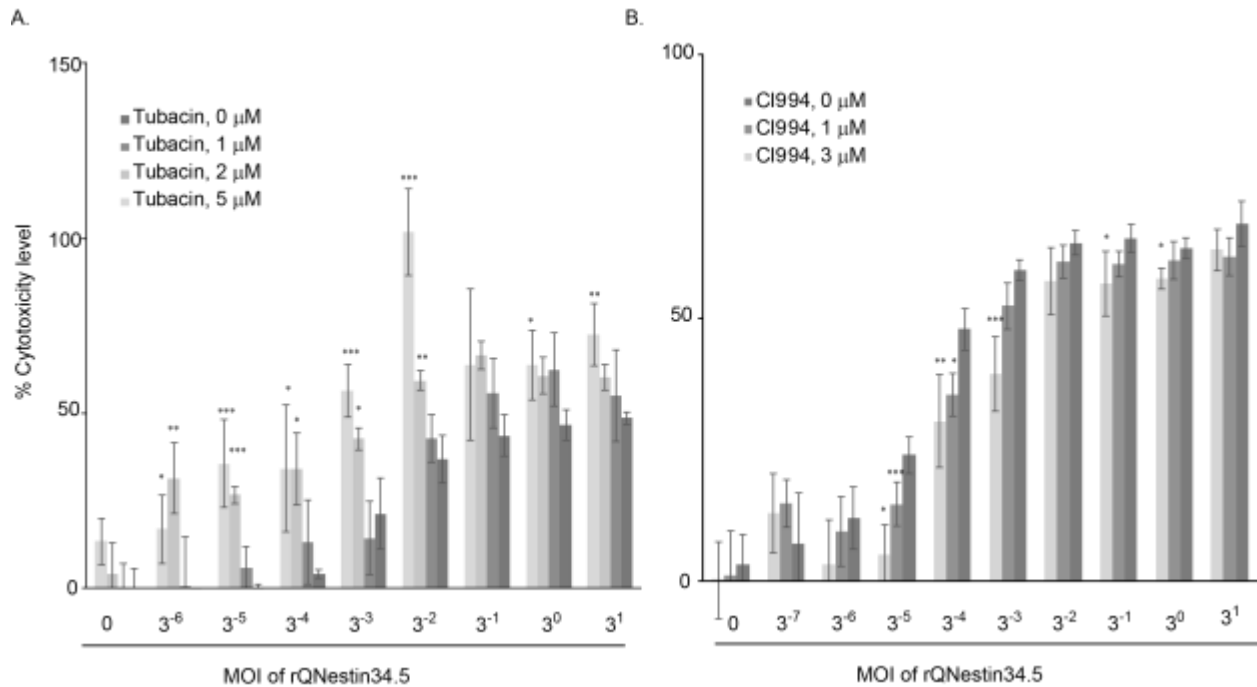

**Figure 1S. Dose-response cytotoxicity of rQNestin34.5 with tubacin and CI994 drugs**

**A.** data are same as those in **Figure 1D**. LDH cytotoxicity assay at the 3d post-infection of rQNestin34.5 in U251 in the presence of tubacin (0, 1, 2 and 5 $\mu\text{M}$ ; starting at 14h before infection). Error bars represent means  $\pm$  SD. **B.** LDH cytotoxicity assay at the 5d post-infection of rQNestin34.5 in U251 in the presence of CI994 (0, 1 and 3 $\mu\text{M}$ ; starting at 14h before infection). Asterisks in plots represent significant differences (\*\* $p < 0.001$ , \* $p < 0.01$ , \* $p < 0.05$ ) by one-way ANOVA with Turkey's multiple comparisons tests.

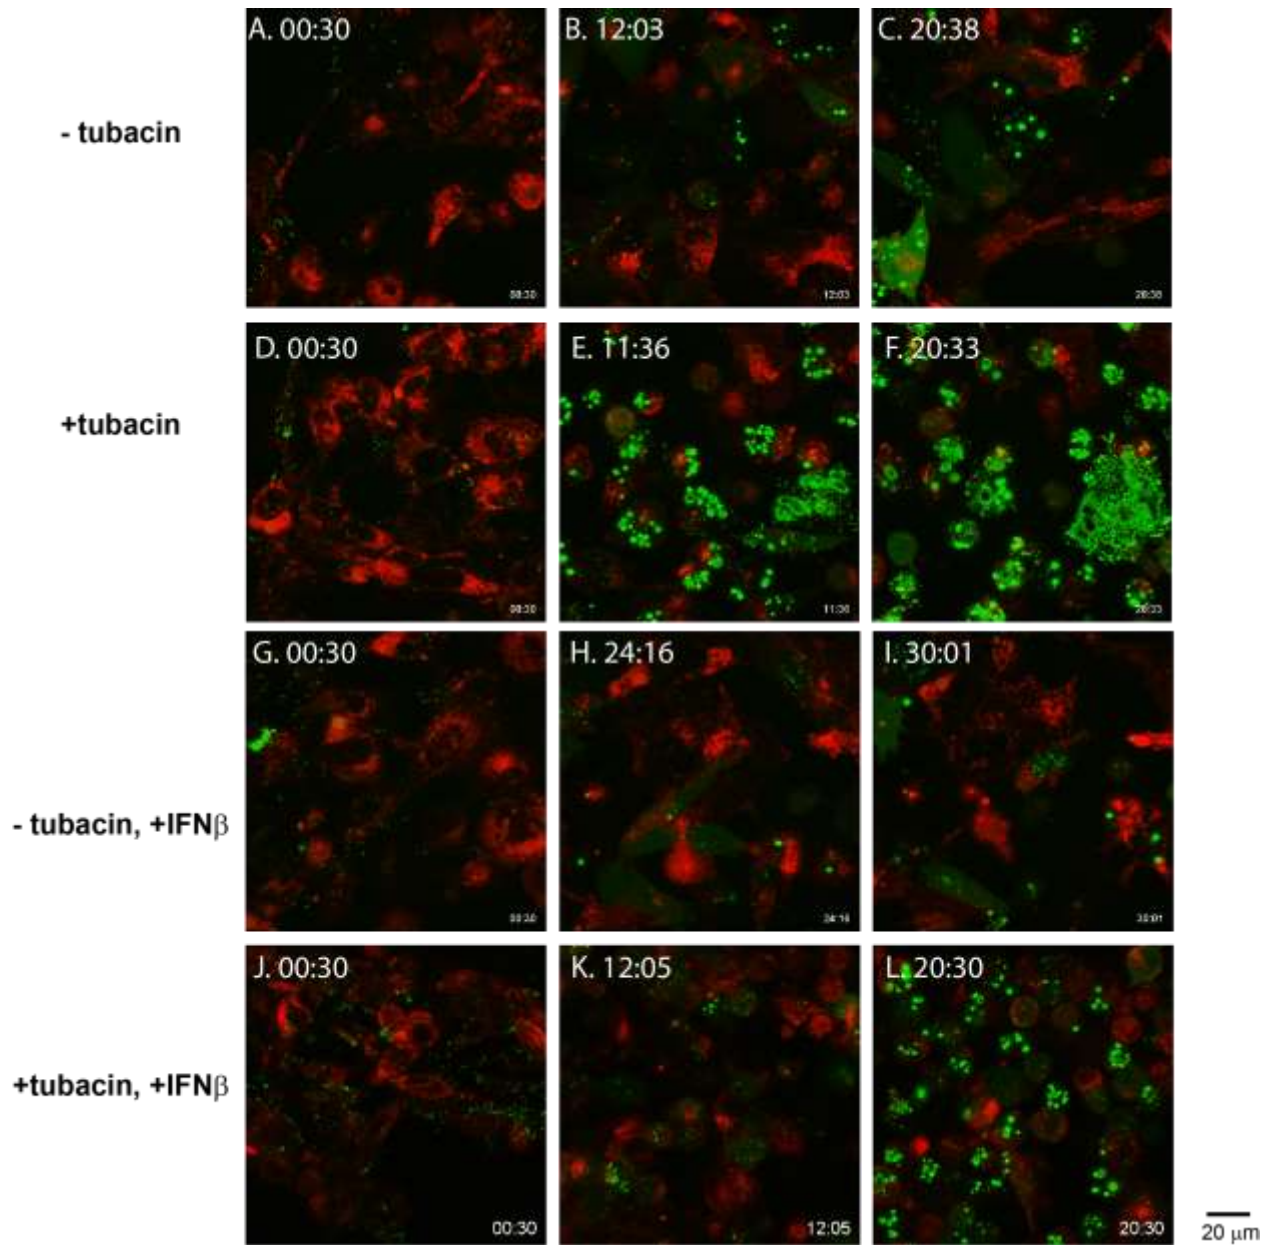

**Figure 2S. Time-lapse fluorescence confocal microscopy observation of HSV1 VP26-GFP.**

Time-lapse z-stack images capture started after infection of RFP-lamp1 expressing U251 cells by a VP26-GFP expressing HSV-1 at 1h in ice-cold temperature, followed by washing unattached viruses. Cells were pretreated with tubacin (15h; in **D-F, J-L**) and/or IFN $\beta$  (14h; in **G-L**). tubacin was added in cultured media during the time-lapse analyses. Time (hh:mm) at left upper in each image indicate the time after infection. **Figure 5 A-D** correspond to **B, E, H and L** in **Figure 2S**. scale bar indicates 20  $\mu$ m.

A

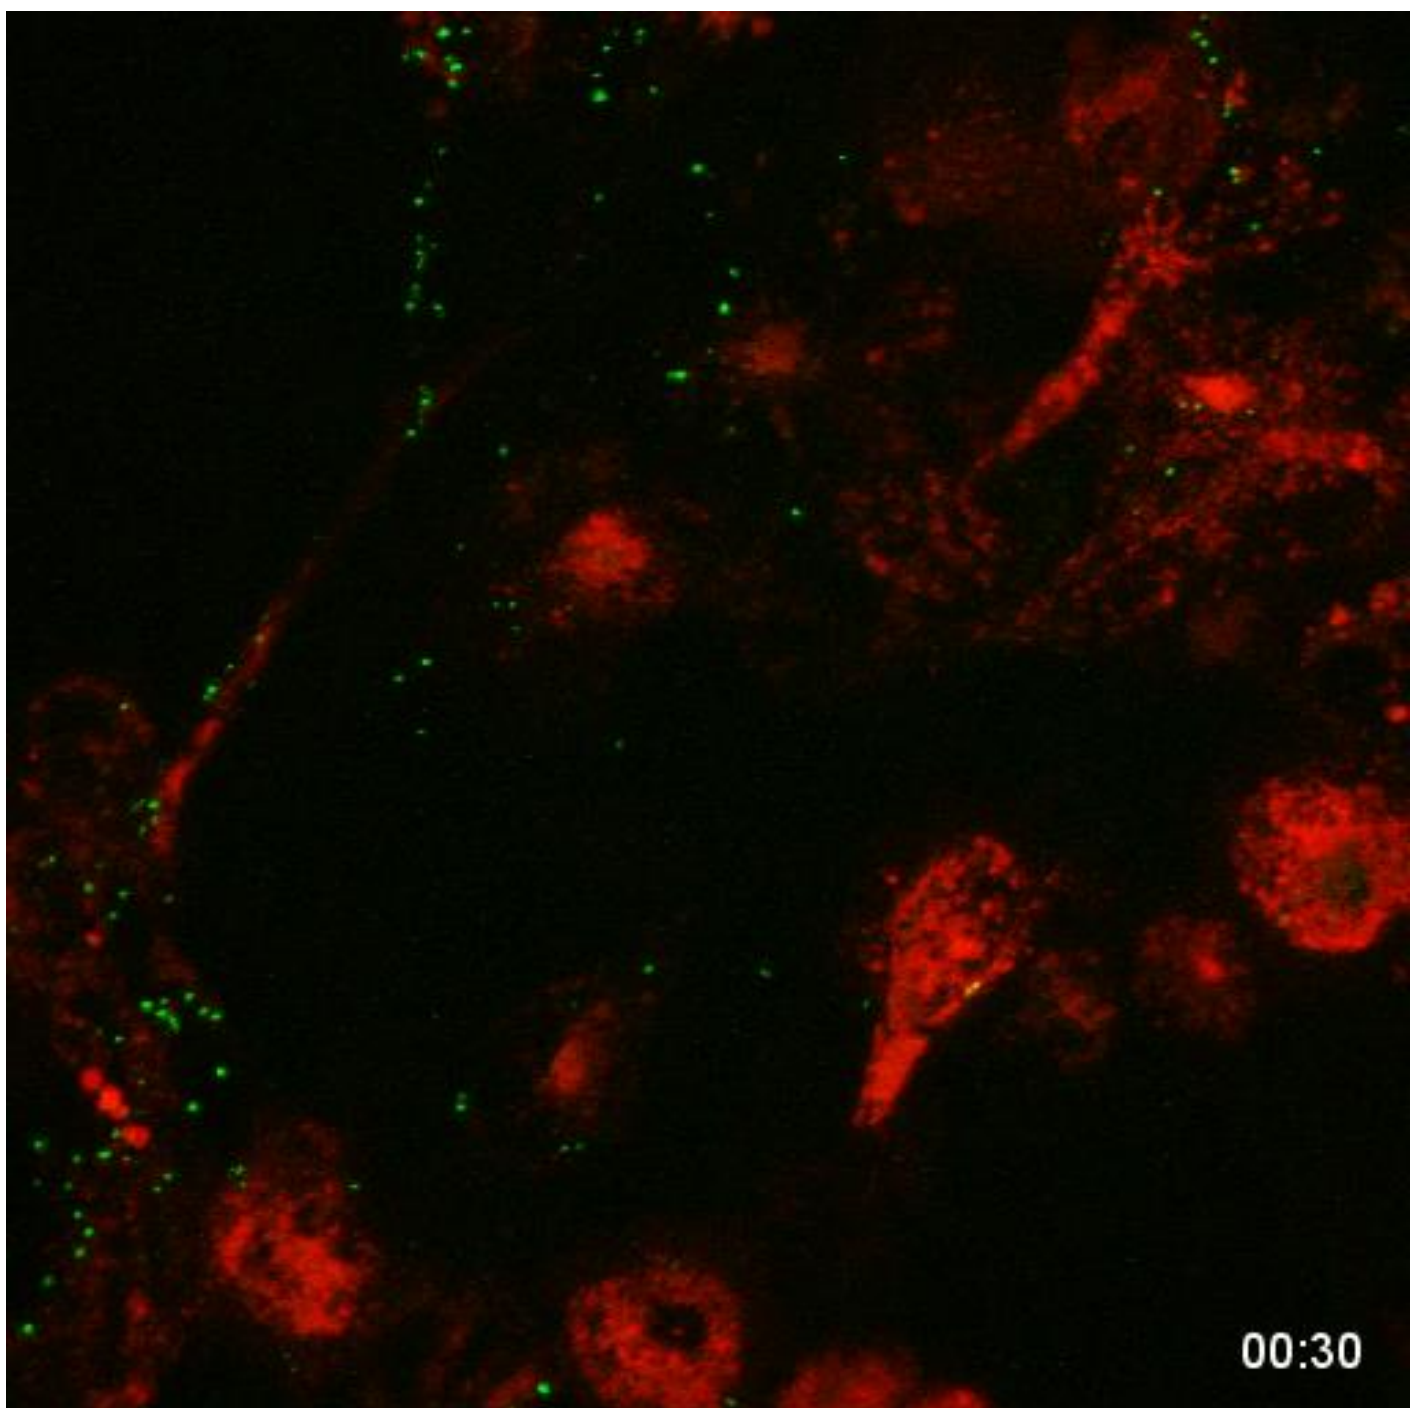

B

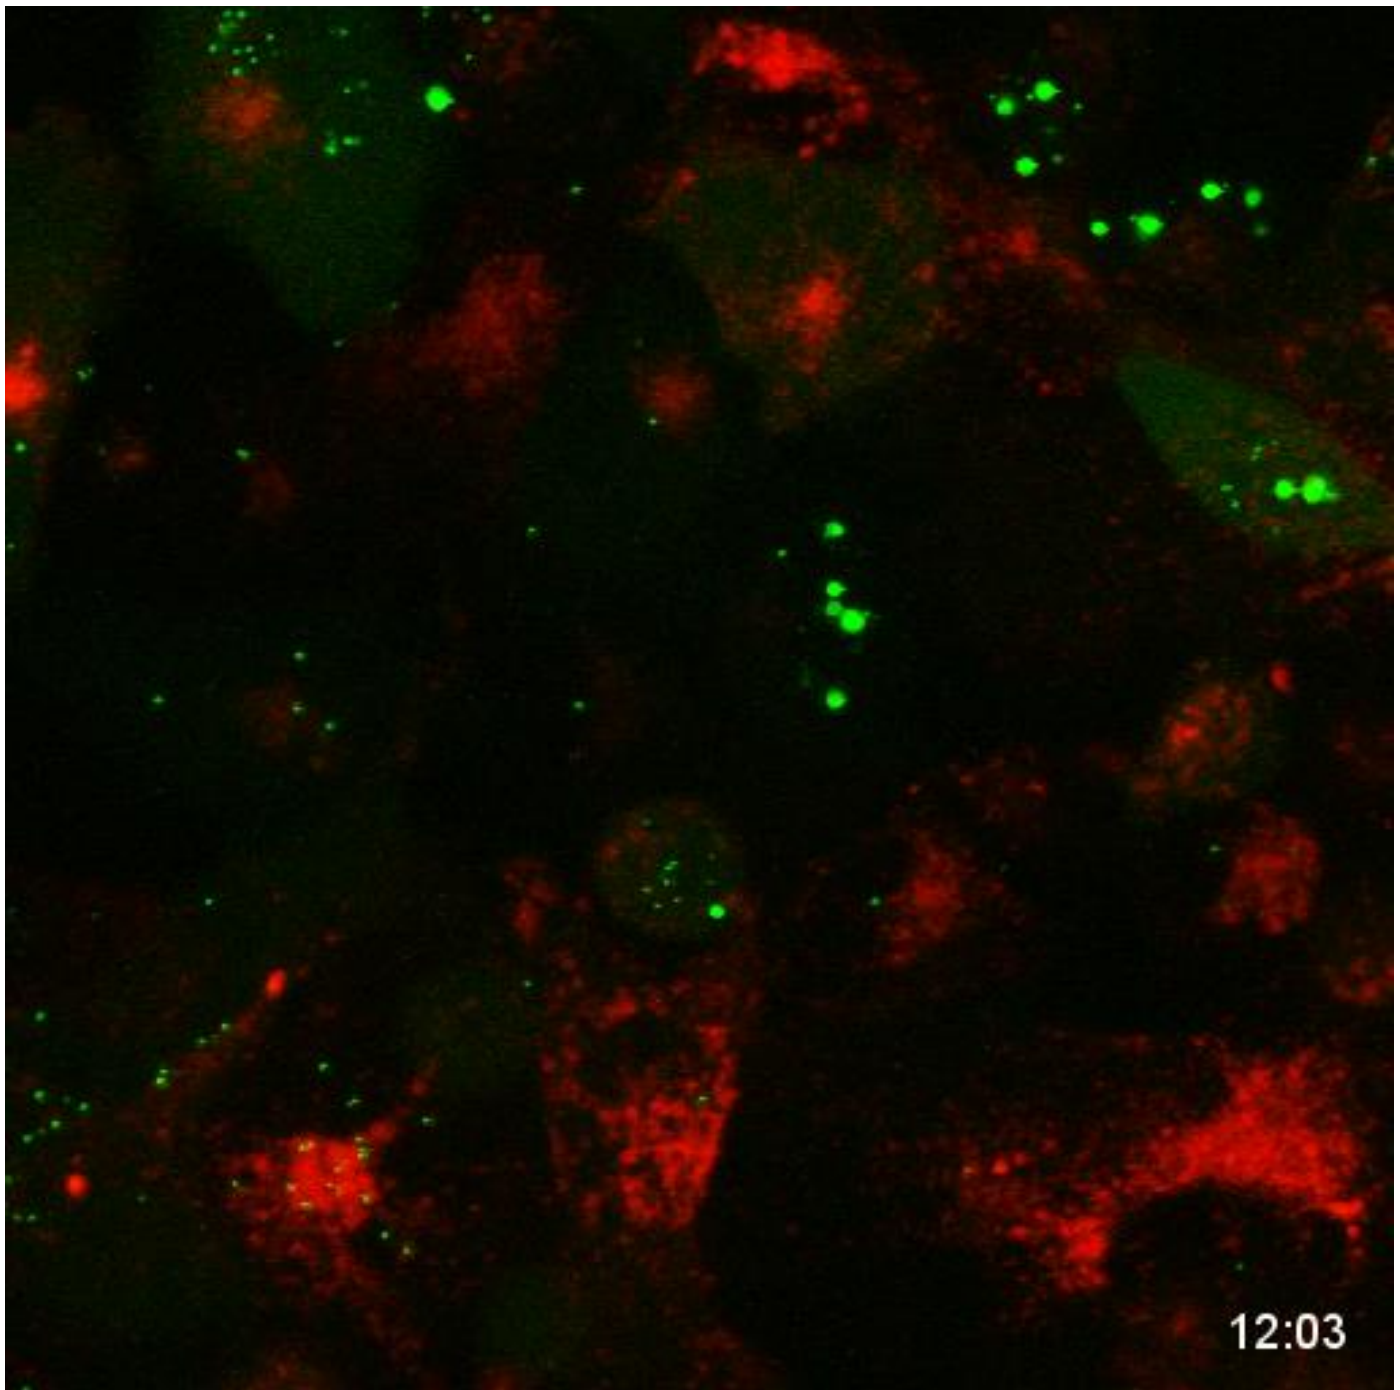

12:03

c

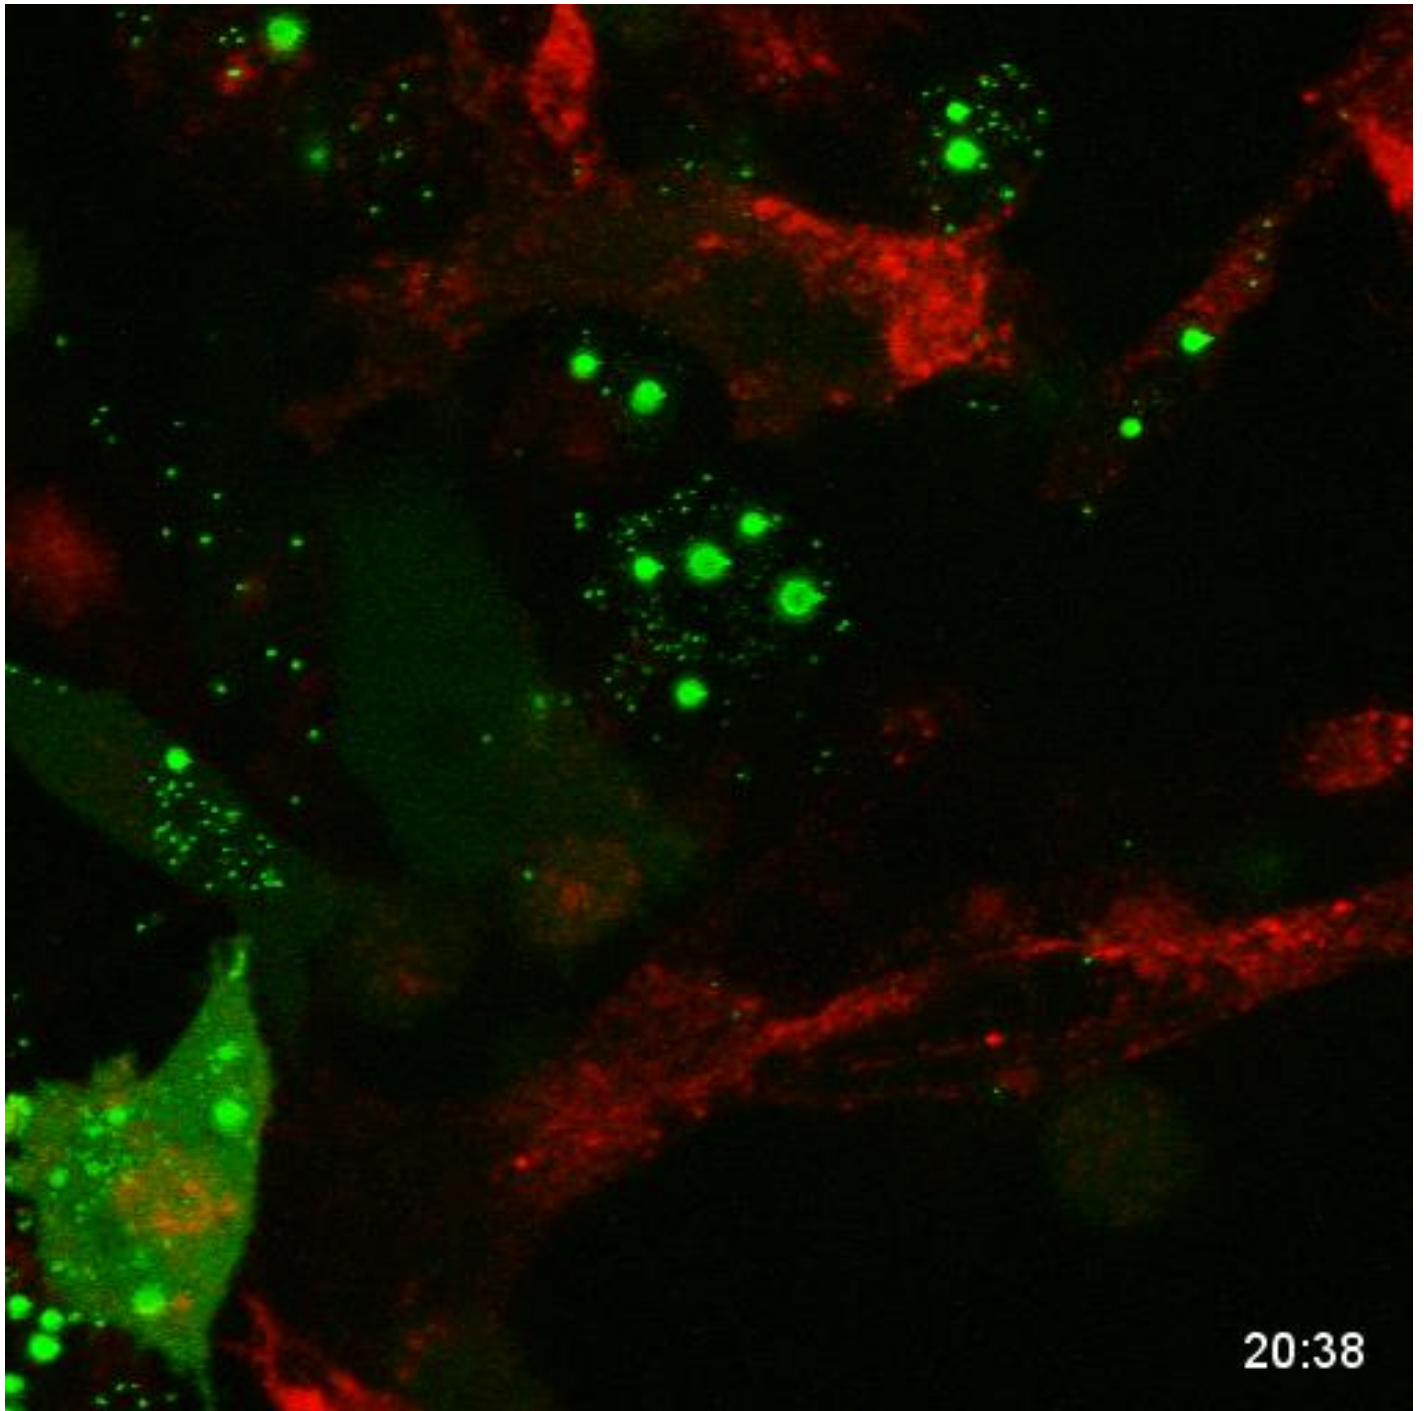

20:38

D

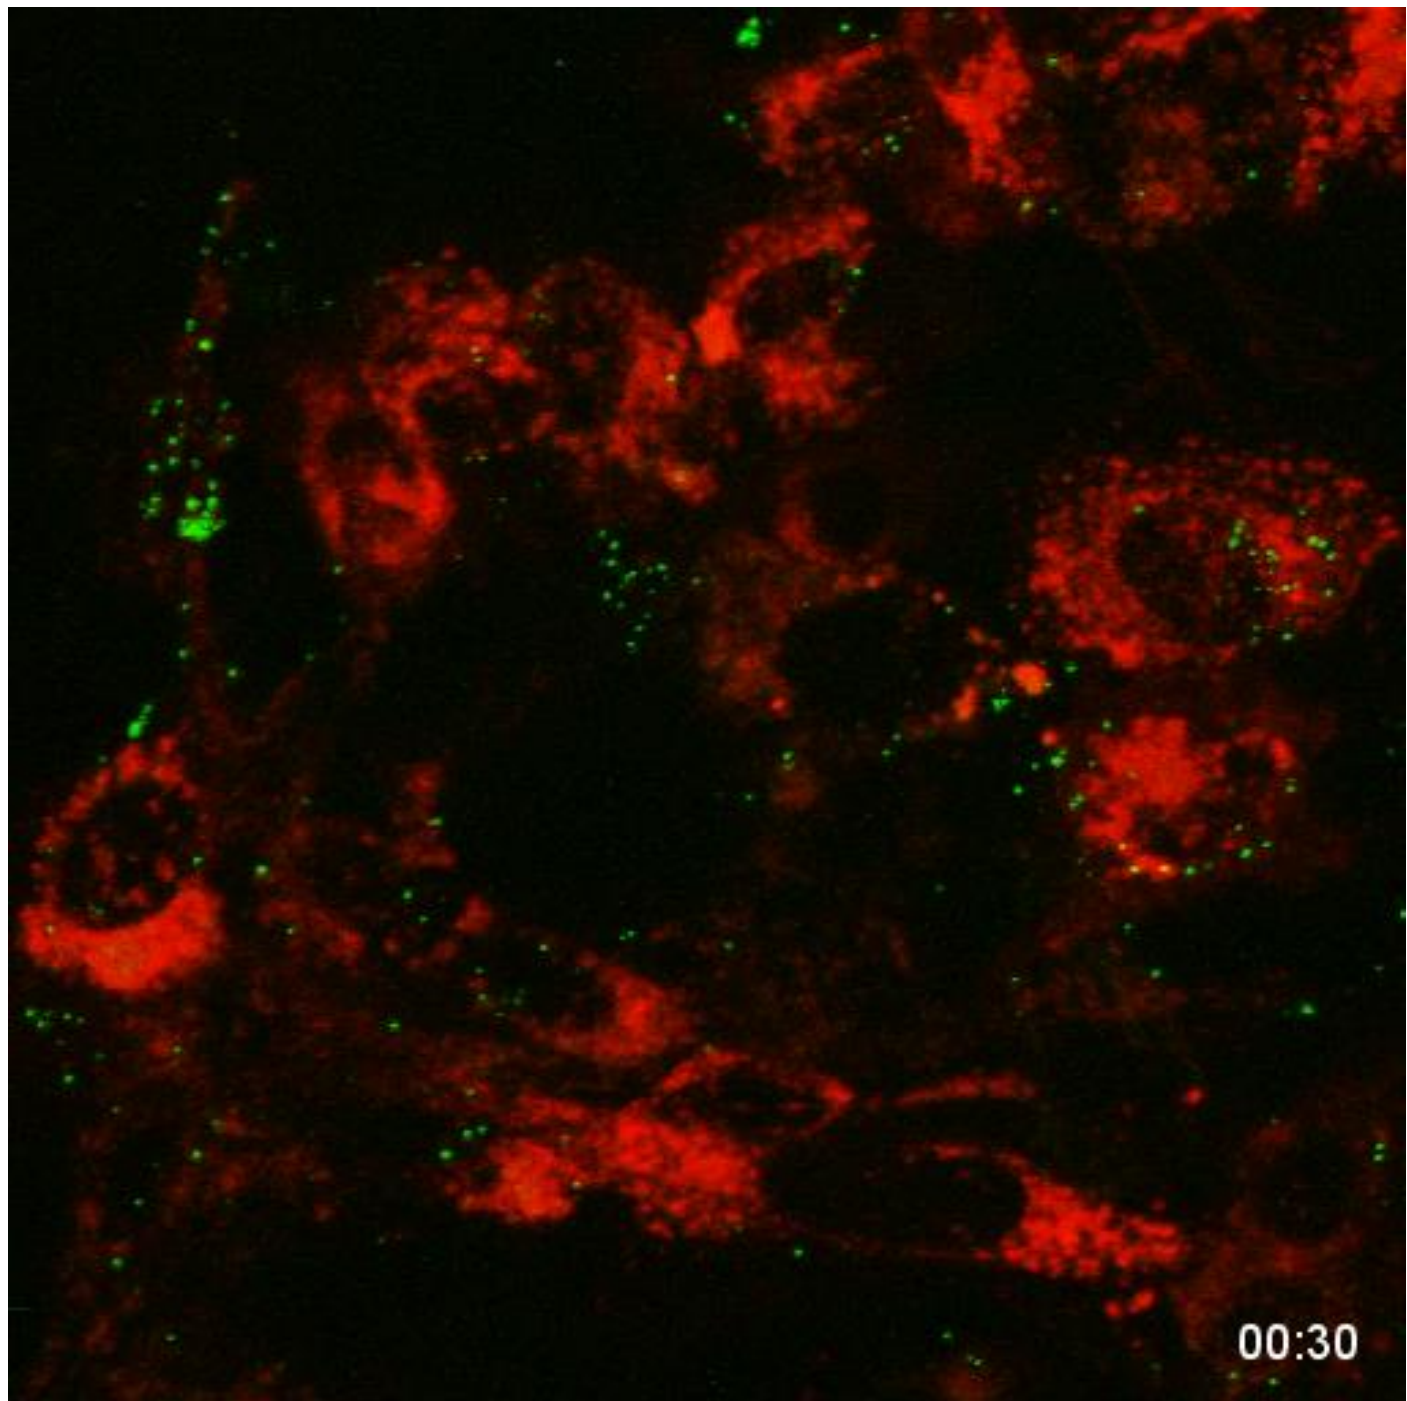

E

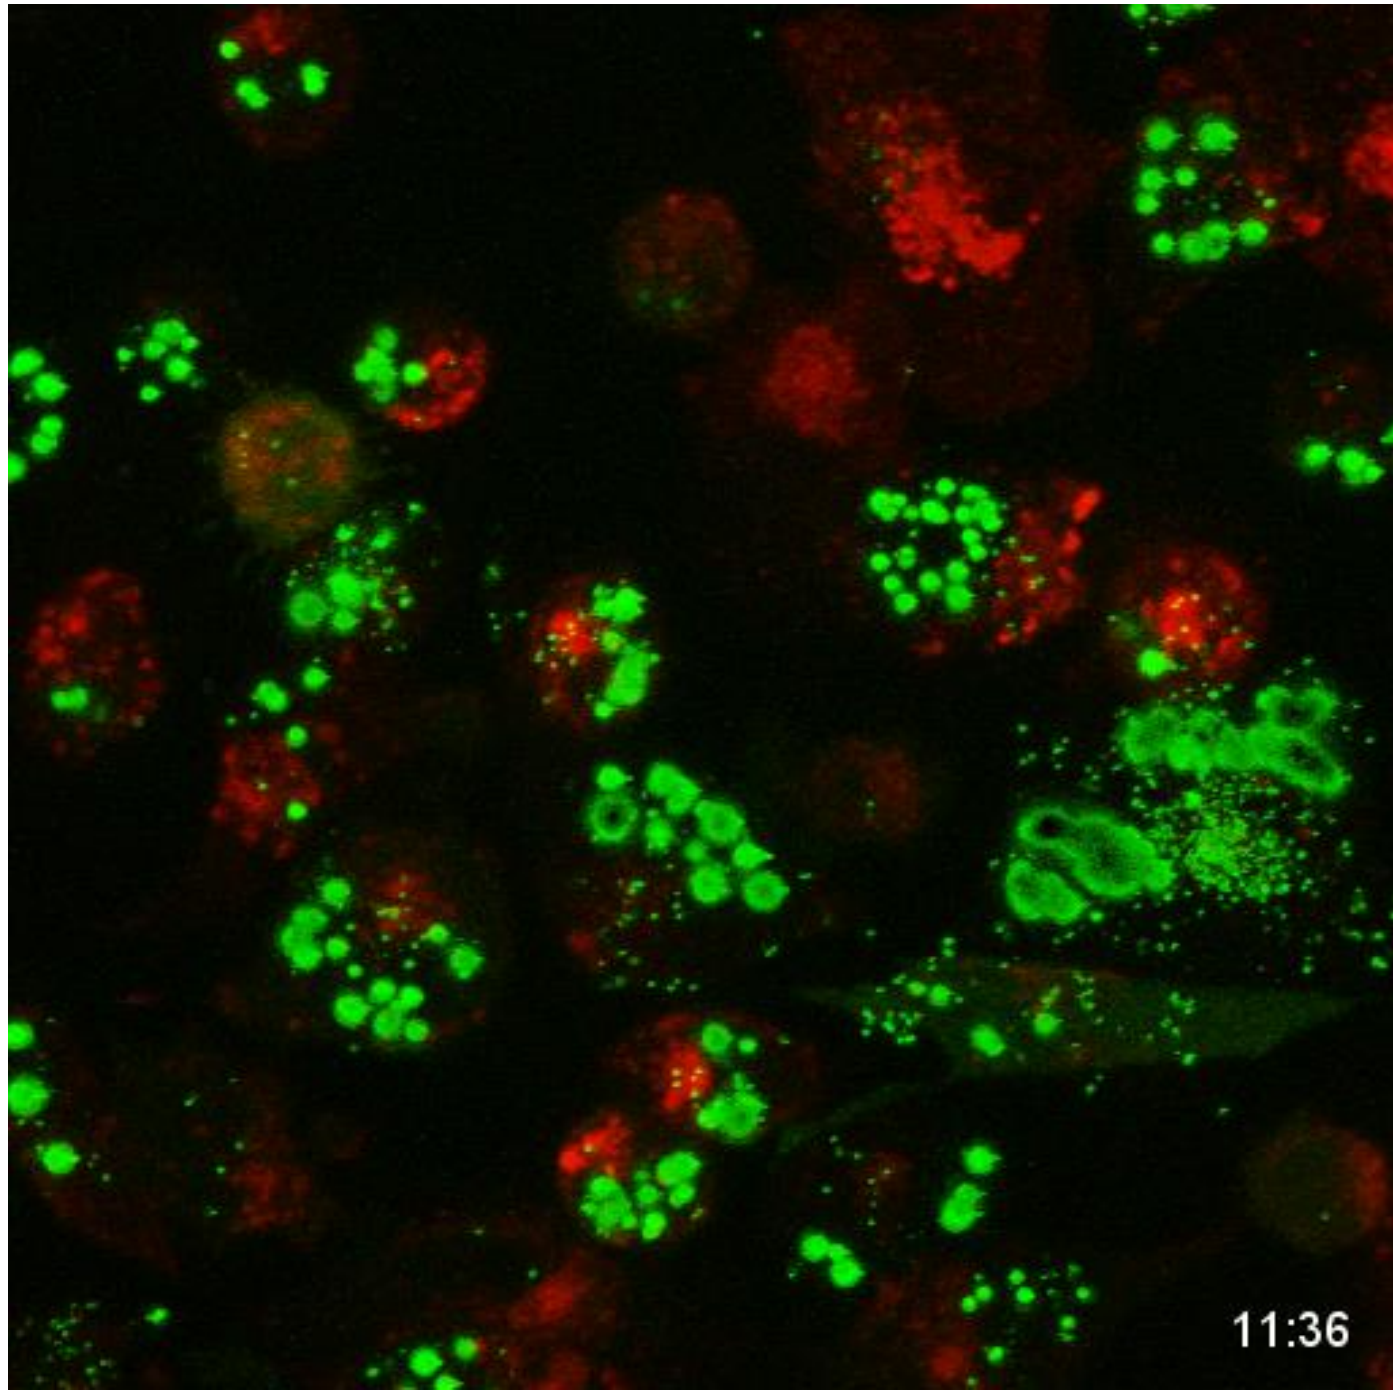

11:36



F

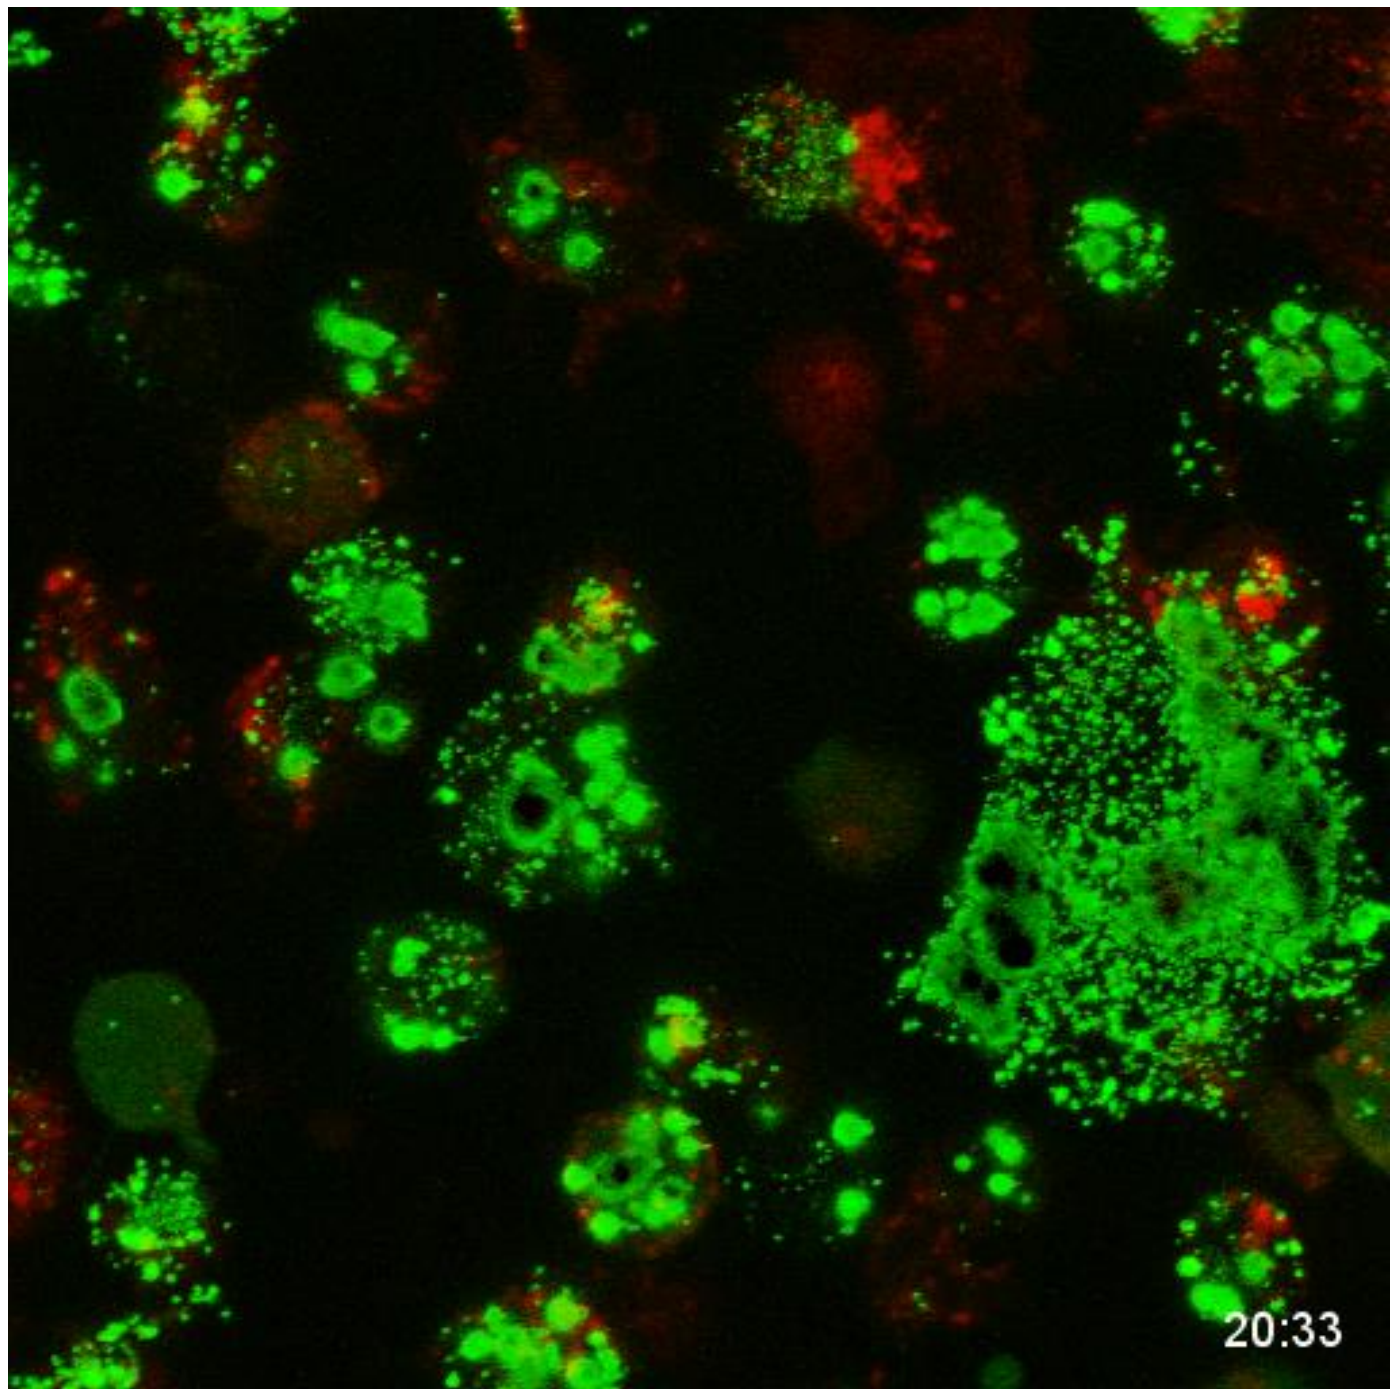

20:33

G

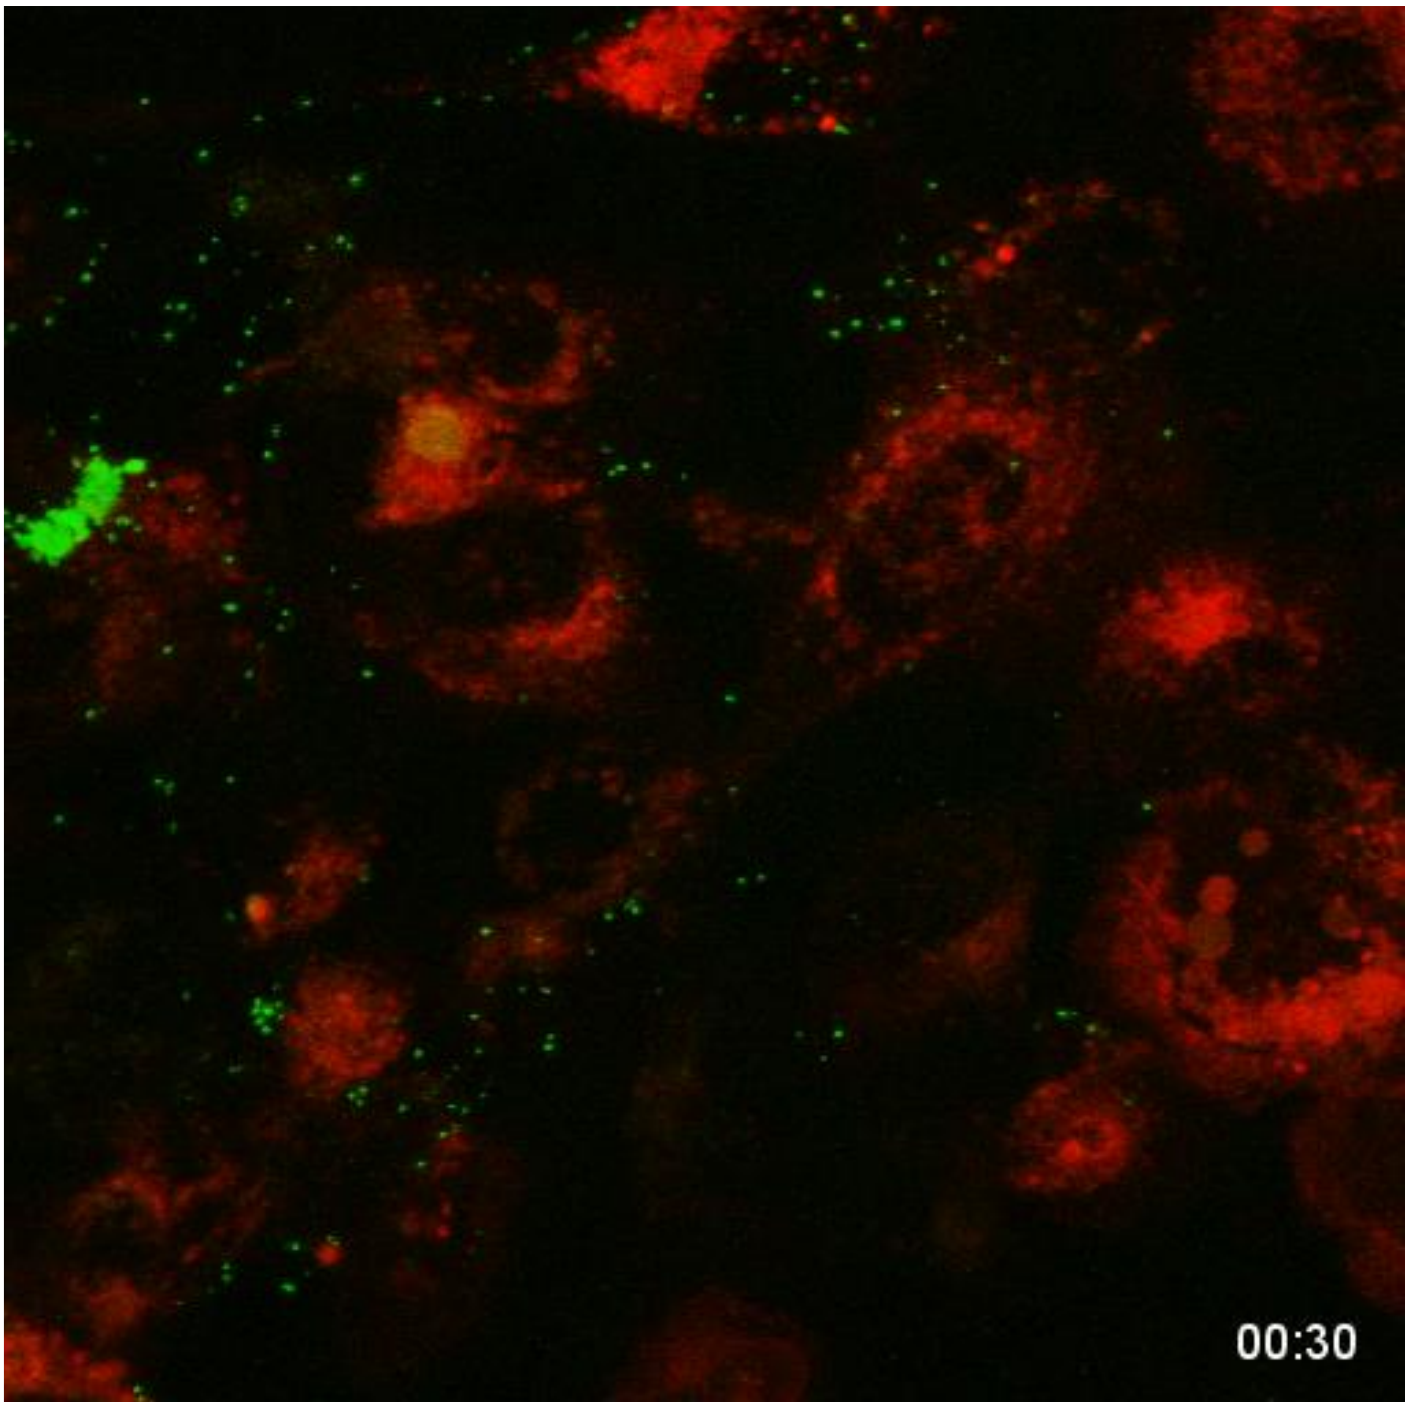

00:30

H

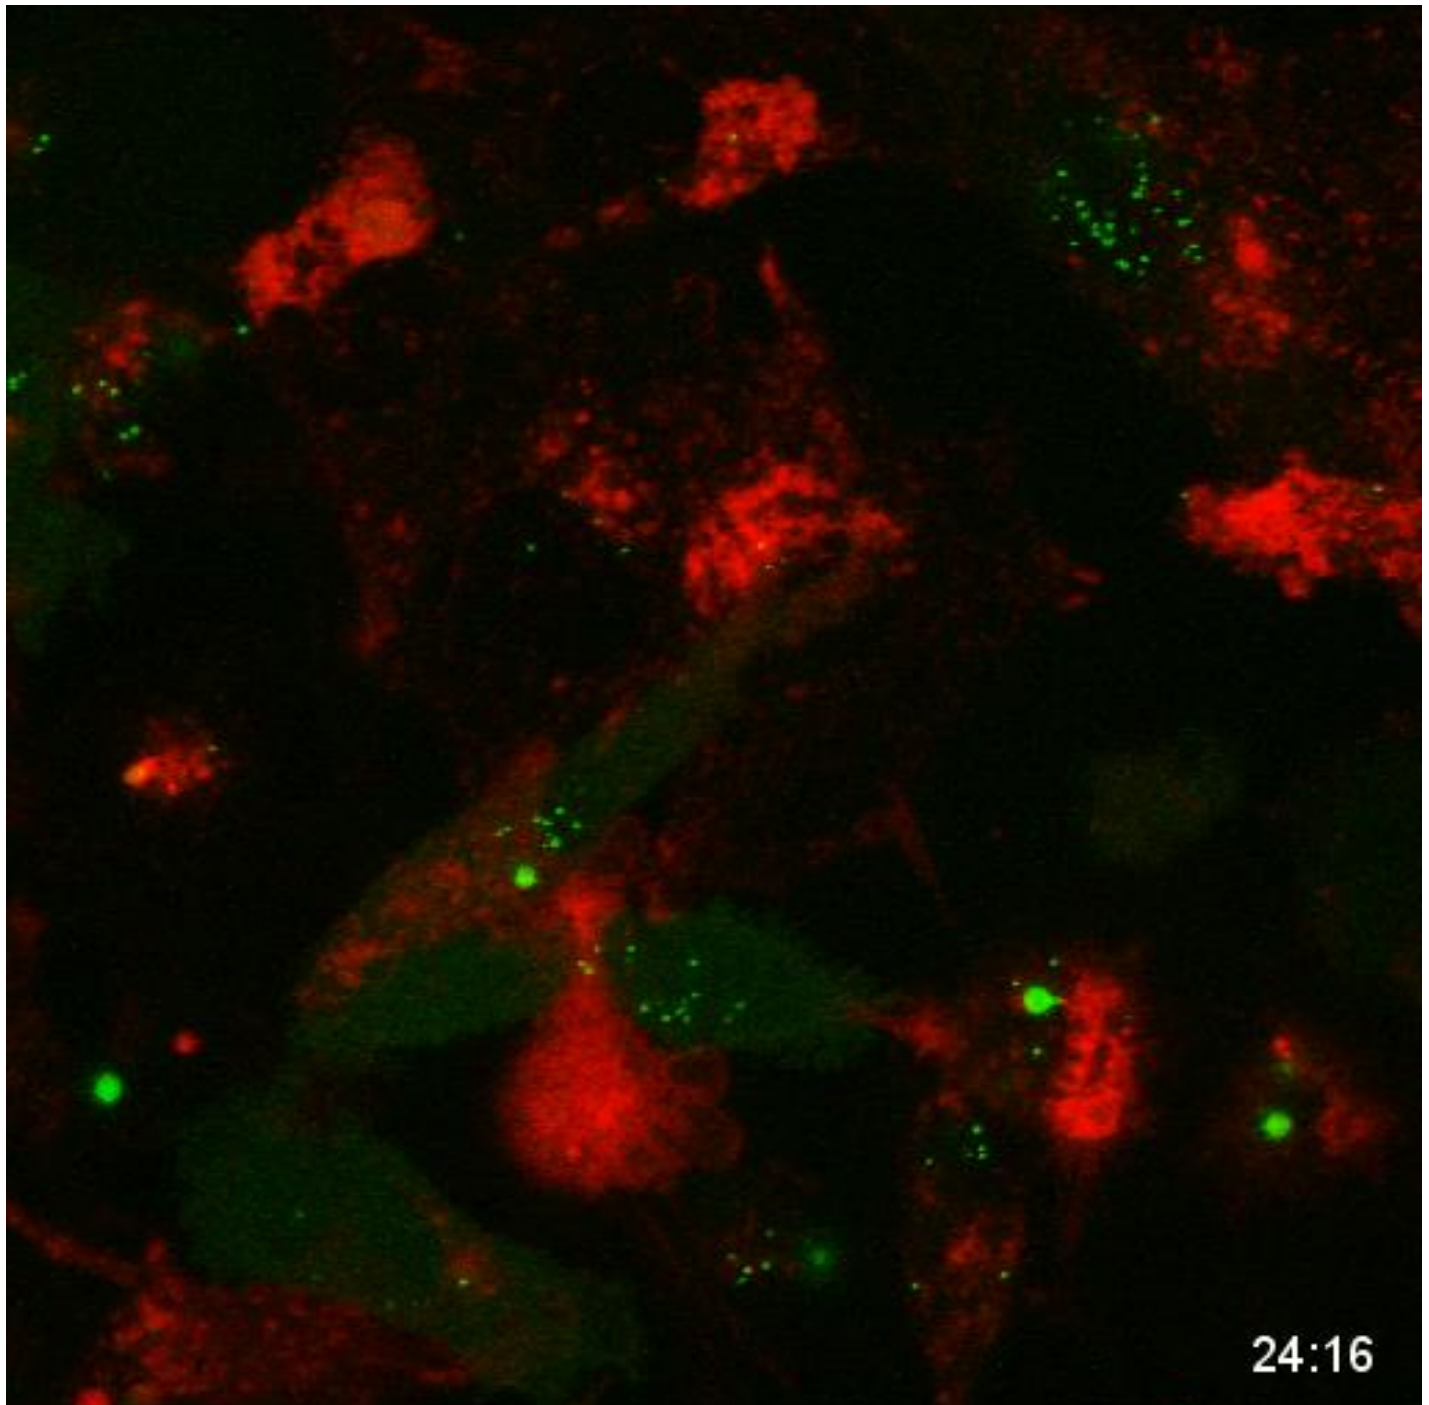

24:16

I

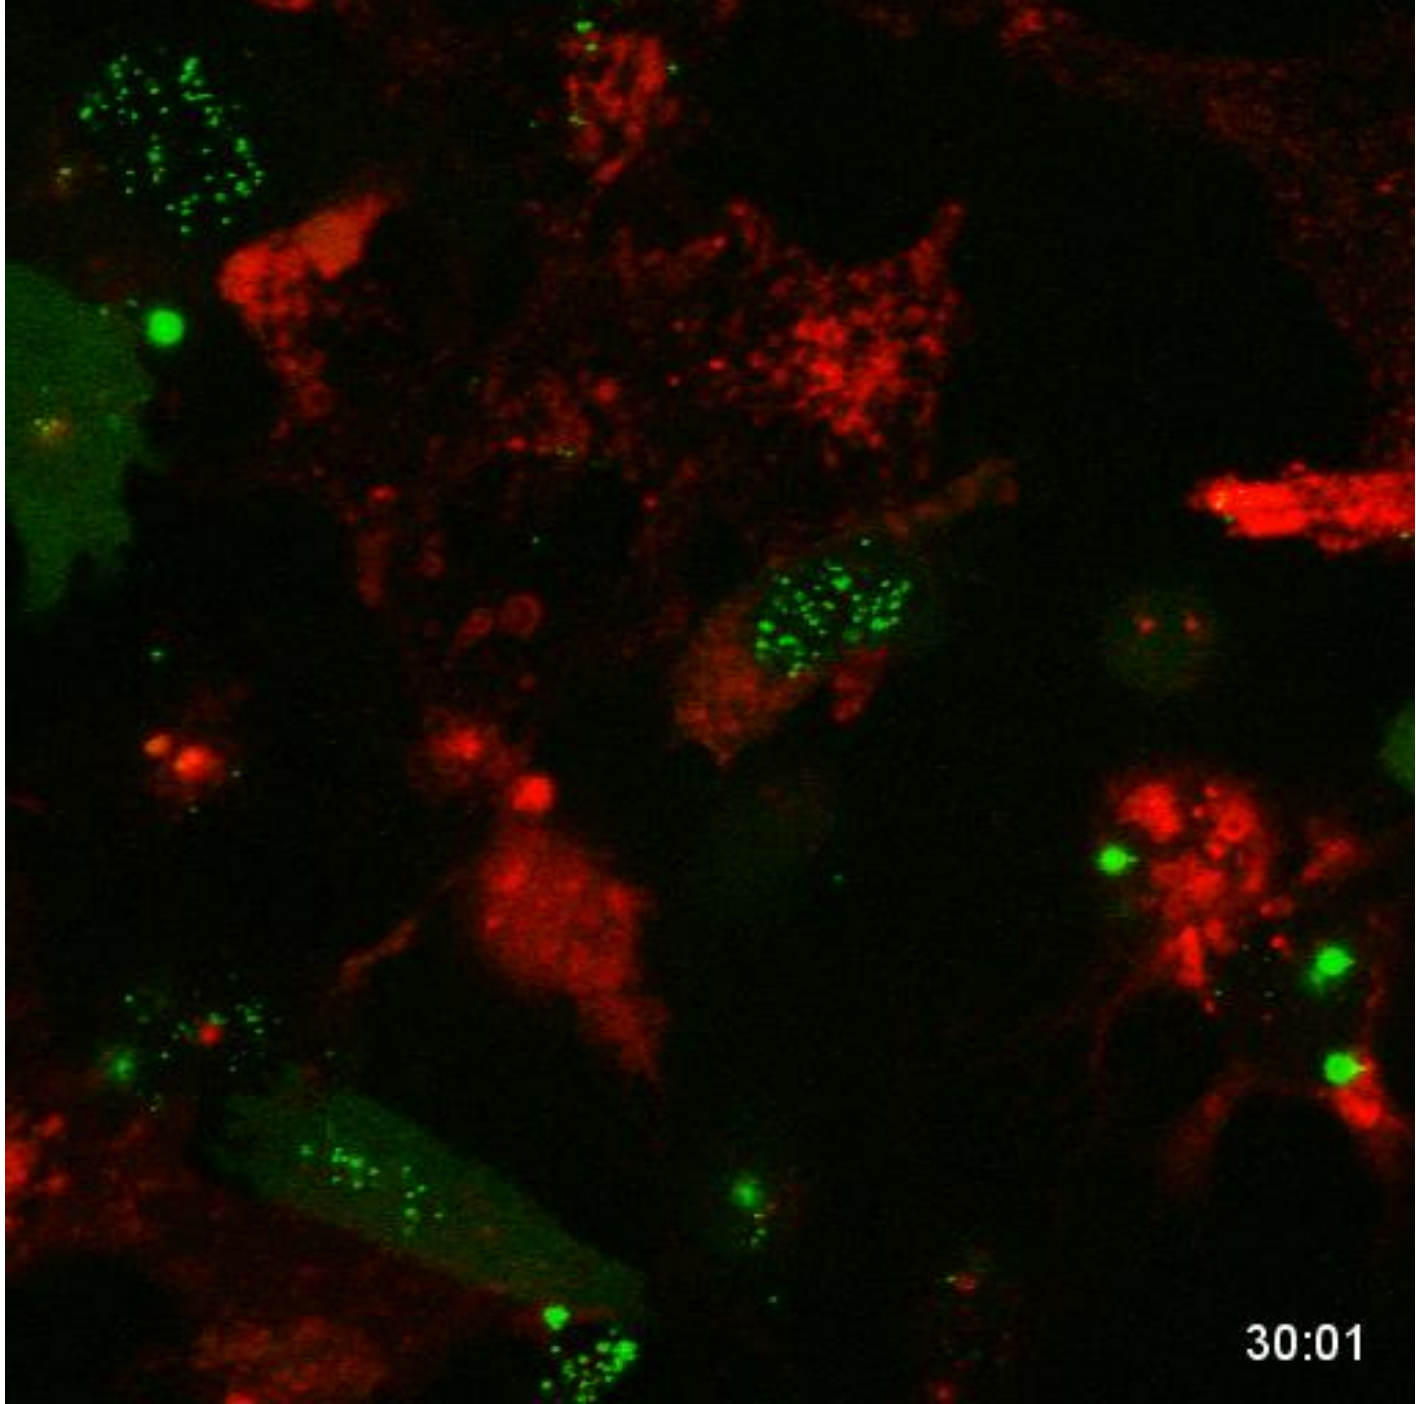

30:01

J

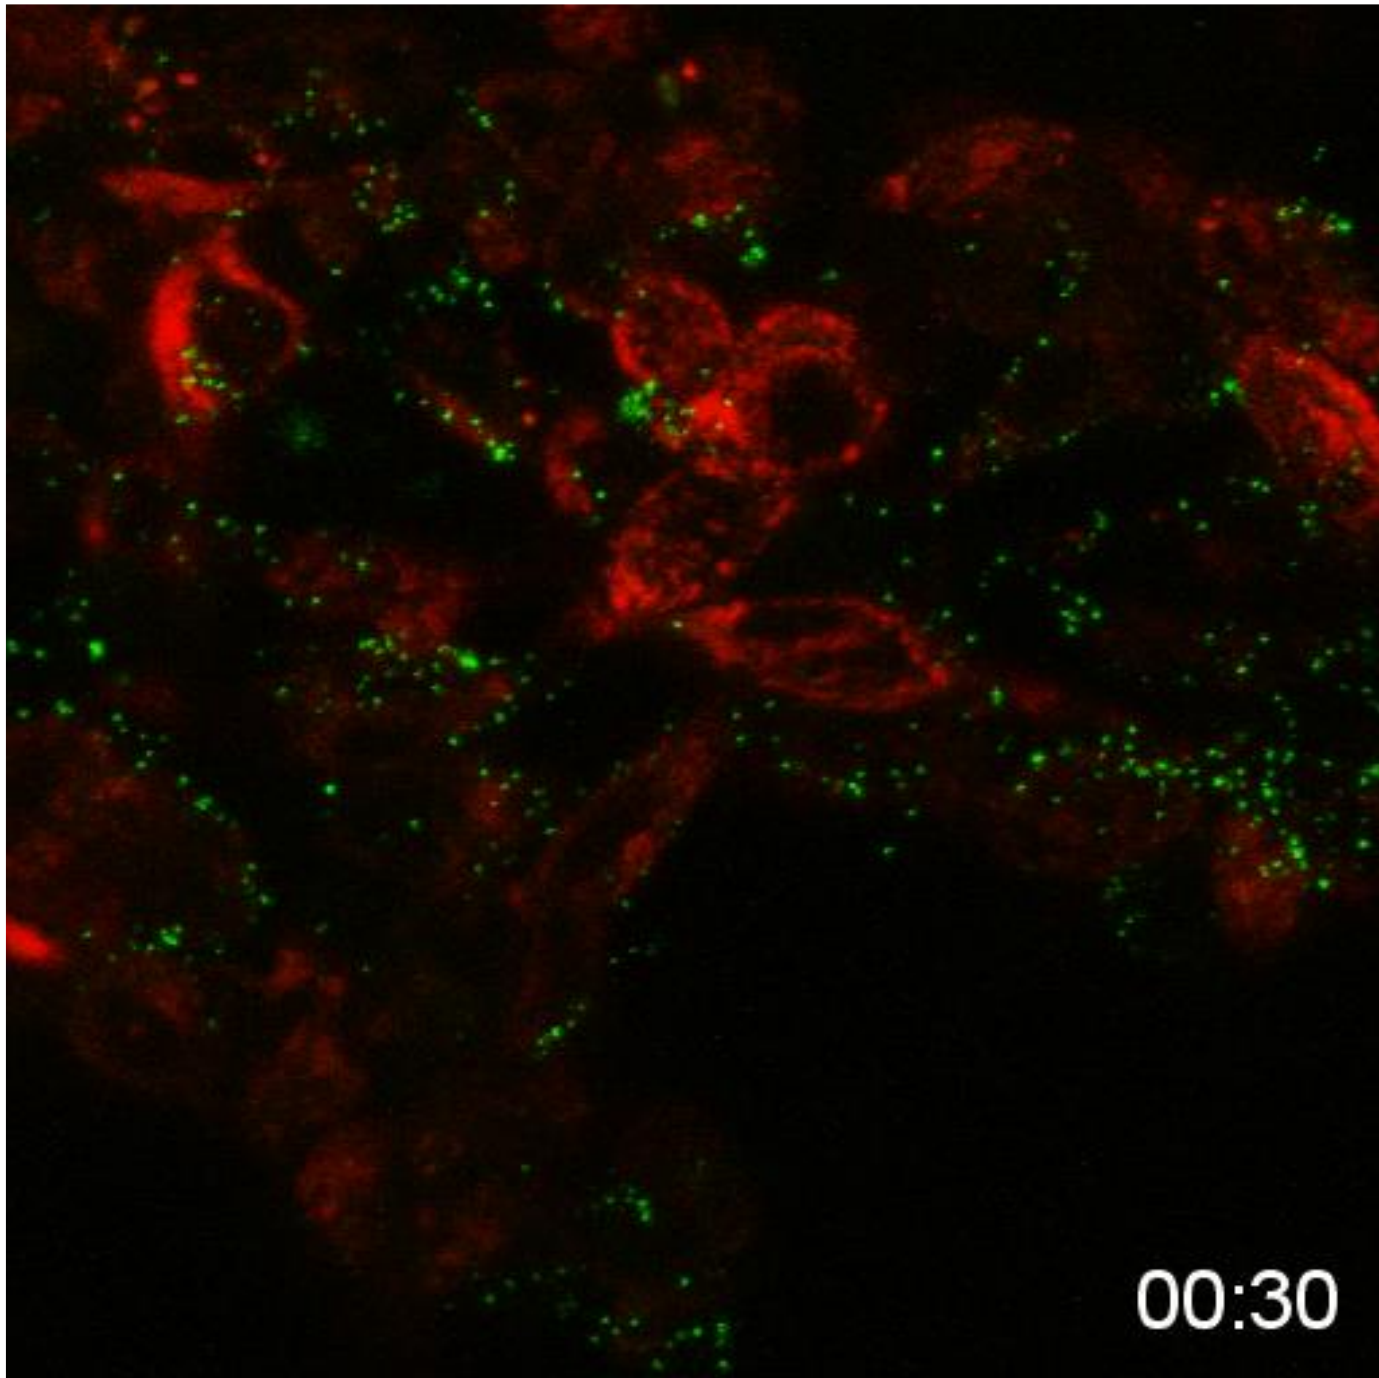

K

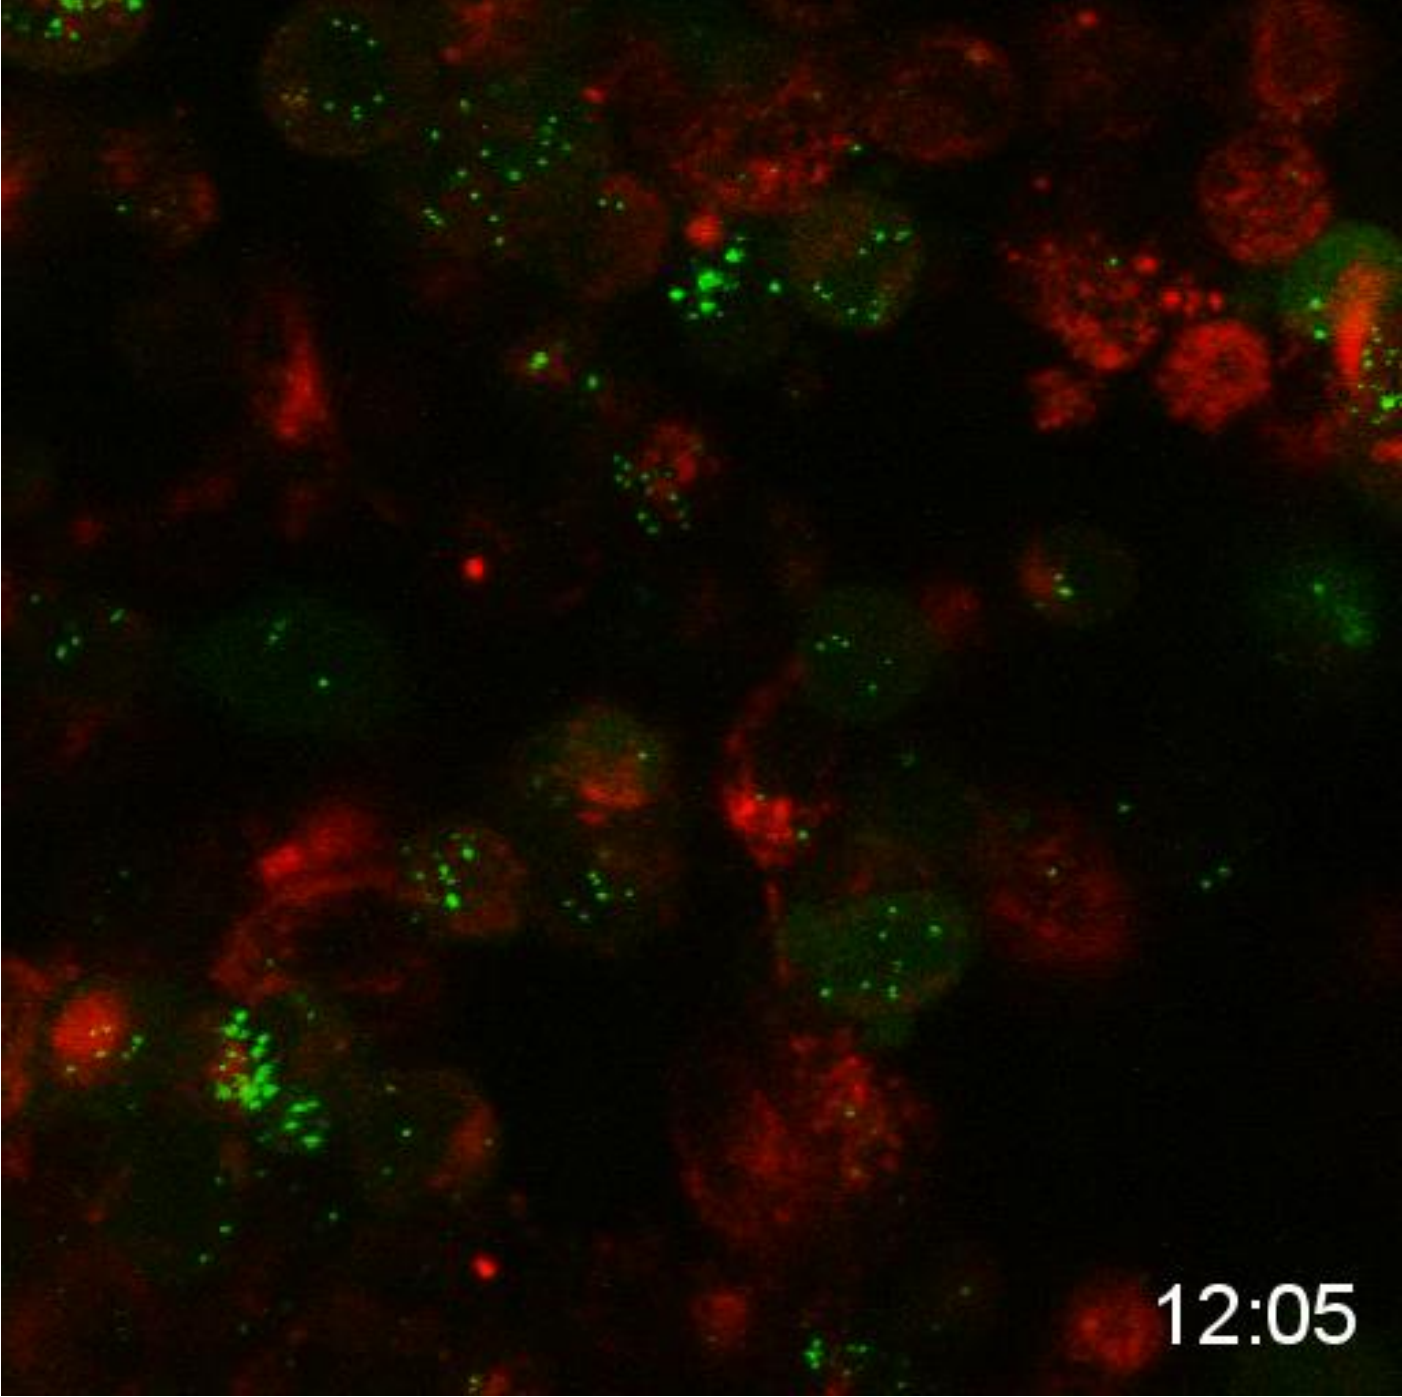

12:05

L

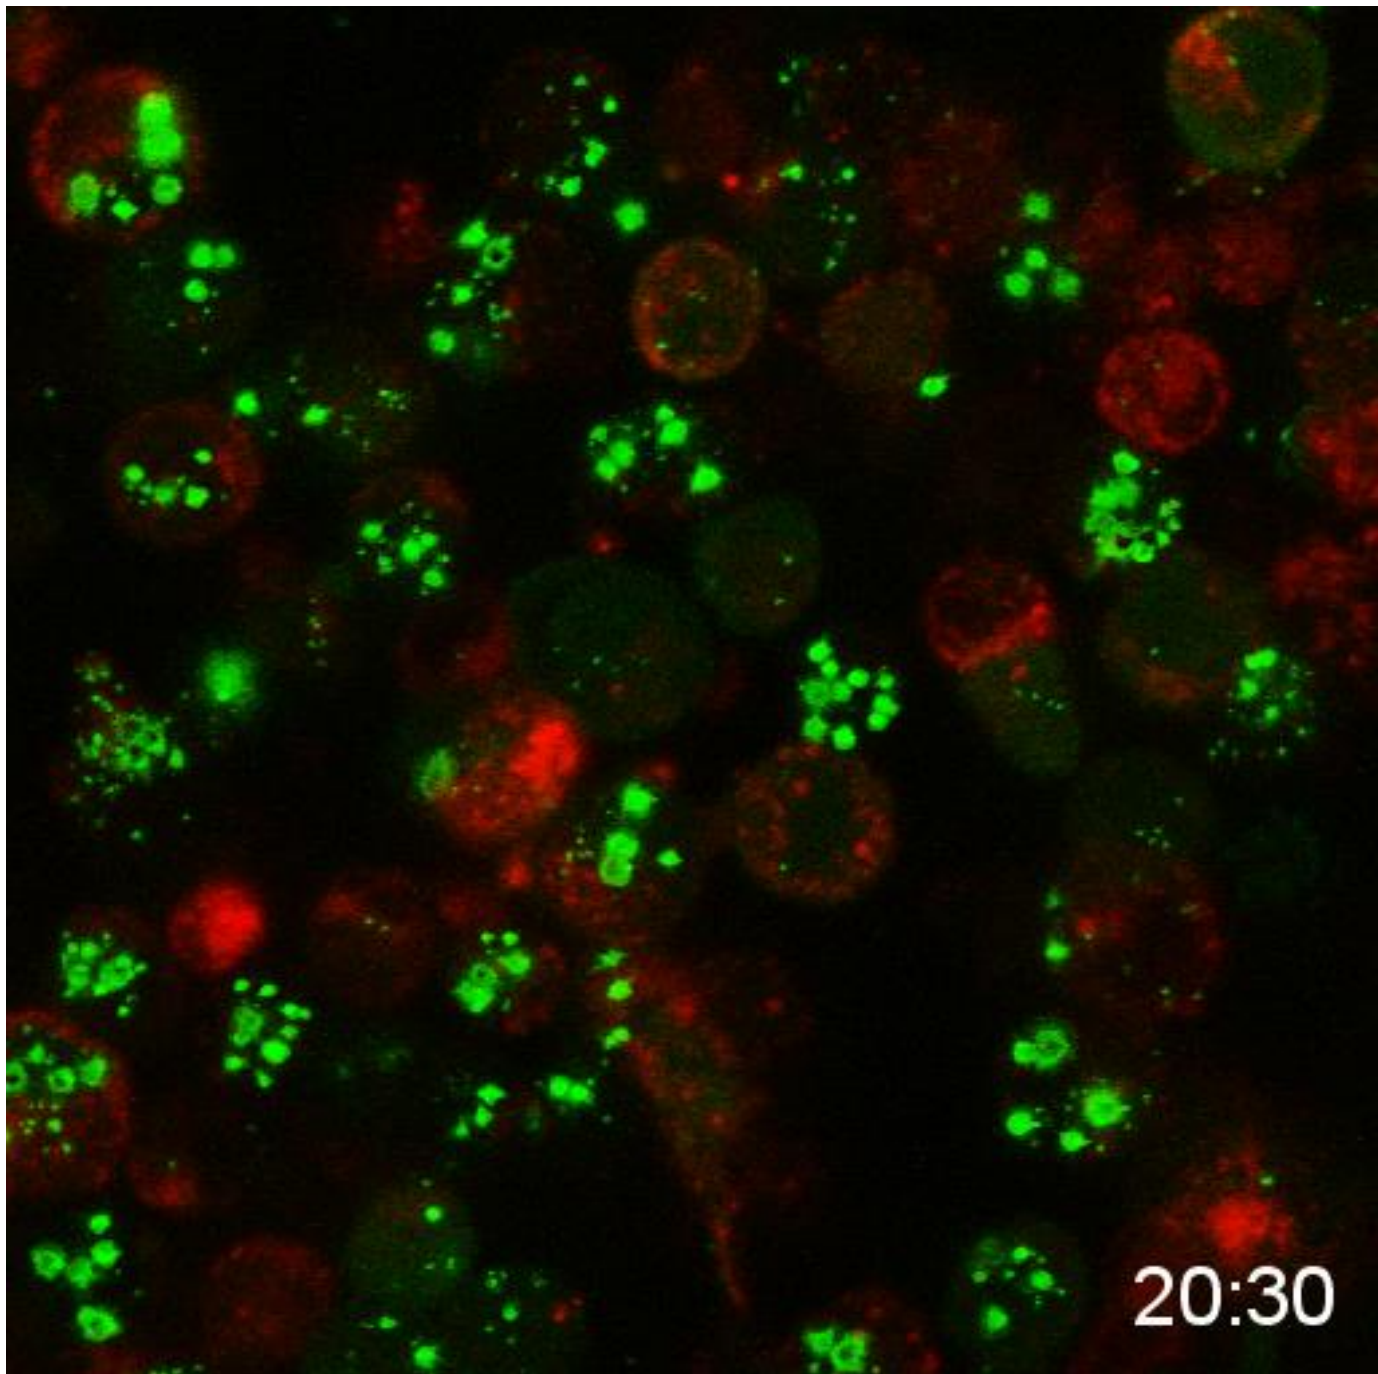

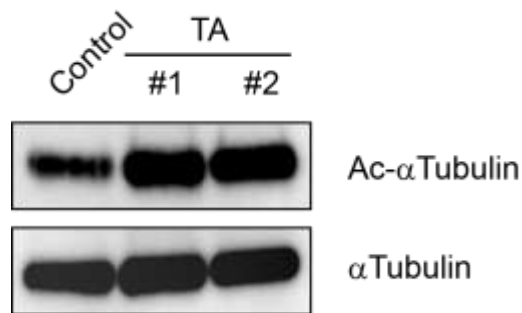

**Figure 3S. Acetylation of  $\alpha$ Tubulin in orthotopic brain tumors after TA.**

Tubulin acetylation in a mouse brain tumor after administration of control solution vs. two mice brain tumors after administration of TA is shown. Tubastatin A (TA) (50 mg per kg body weight) was administered i.p. every day for five days starting 4 days after GBM30 (100,000 cells per mouse) injection in Nu/nu mice brains. TA administration was continued then every other day until harvest of brain tumors at the 15 day time point. Tissues were homogenized in RIPA buffer (50mM Tris-HCl pH8, 150 mM NaCl, 1% NP-40, 0.5% sodium deoxycholate, 0.1% SDS and protease inhibitor cocktail) before Western Blot analysis using antibodies against  $\alpha$ Tubulin and acetylated  $\alpha$ Tubulin (see detailed WB analyses in materials and methods section).
